# Supplementary material for: Two Fixed Ratio Dilutions for Soil Salinity Monitoring in Hypersaline Wetlands
Source: PubMed Central journal article supplement (PMC4441515; doi:10.1371/journal.pone.0126493), 2015-05-22
Supplement: pone.0126493.s001.pdf [file pone.0126493.s001.pdf]

**S1 Table. UTM coordinates (European Datum ED 50) of the 59 sampling sites with their vegetation and the depth of the augerings.**

| Wetland            | Site   | Coord. X | Coord. Y  | Vegetation                                                  | Depth, cm |
|--------------------|--------|----------|-----------|-------------------------------------------------------------|-----------|
| <b>Amarga Alta</b> | AMA-1  | 745955.9 | 4587215.4 | <i>Frankenia pulverulenta</i>                               | 200       |
|                    | AMA-2  | 746062.3 | 4587178.9 | Bare soil                                                   | 200       |
|                    | AMA-3  | 746211.5 | 4587132.2 | <i>Suaeda vera</i>                                          | 150       |
|                    | AMA-4  | 746299.3 | 4587100.4 | Winter cereal                                               | 150       |
|                    | AMA-5  | 746426.0 | 4587058.4 | <i>Salsolo-Artemisietum</i>                                 | 50        |
| <b>Amarga Baja</b> | AMB-01 | 748475.2 | 4588286.4 | <i>Aeluropus litoralis</i>                                  | 150       |
|                    | AMB-02 | 748522.6 | 4588231.2 | Bare soil                                                   | 175       |
|                    | AMB-03 | 748563.0 | 4588184.6 | <i>Salicornia ramosissima</i>                               | 200       |
|                    | AMB-04 | 748617.4 | 4588120.1 | <i>Lygeum spartum</i>                                       | 200       |
|                    | AMB-05 | 748677.2 | 4588051.7 | <i>Salsolo-Artemisietum</i>                                 | 150       |
|                    | AMB-06 | 748789.9 | 4588106.9 | Winter cereal                                               | 150       |
| <b>Camarón</b>     | CMR-01 | 726904.7 | 4587453.9 |                                                             | 140       |
|                    | CMR-02 | 727060.2 | 4587377.6 | Bare soil                                                   | 200       |
|                    | CMR-03 | 727195.8 | 4587322.9 |                                                             | 180       |
| <b>Guallar</b>     | GLR-01 | 731699.0 | 4587997.0 |                                                             | 140       |
|                    | GLR-02 | 731812.0 | 4587935.0 | Bare soil                                                   | 260       |
|                    | GLR-03 | 732020.0 | 4587840.0 |                                                             | 120       |
|                    | GLR-04 | 732070.0 | 4587829.0 |                                                             | 200       |
|                    | GLR-05 | 732101.0 | 4587816.0 |                                                             | 180       |
|                    | GLR-06 | 732149.0 | 4587722.0 | <i>S. vera</i>                                              | 60        |
|                    | GLR-07 | 732089.0 | 4587742.0 |                                                             | 160       |
|                    | GLR-08 | 732102.0 | 4587705.0 |                                                             | 80        |
|                    | GLR-09 | 732138.0 | 4587687.0 | Winter cereal                                               | 80        |
|                    | GLR-10 | 732173.0 | 4587678.0 |                                                             | 80        |
| <b>Gramenosa</b>   | GRM-01 | 742287.0 | 4586591.0 |                                                             | 100       |
|                    | GRM-02 | 742318.0 | 4586636.0 | Winter cereal                                               | 100       |
|                    | GRM-03 | 742338.0 | 4586669.0 |                                                             | 100       |
|                    | GRM-04 | 742350.0 | 4586689.0 | <i>S. vera</i>                                              | 75        |
|                    | GRM-05 | 742382.0 | 4586733.0 |                                                             | 150       |
|                    | GRM-06 | 742412.0 | 4586754.0 |                                                             | 150       |
|                    | GRM-07 | 742443.0 | 4586793.0 | <i>S. vera</i> +<br>Ruderal nitrophilous scrubs and grasses | 150       |
|                    | GRM-08 | 742479.0 | 4586837.0 |                                                             | 150       |
|                    | GRM-09 | 742507.0 | 4586878.0 |                                                             | 150       |
|                    | GRM-10 | 742528.0 | 4586925.0 | <i>S. vera</i> + <i>F. pulverulenta</i>                     | 150       |
|                    | GRM-11 | 742551.0 | 4586937.0 | Winter cereal                                               | 125       |
| <b>Muerte</b>      | MRT-01 | 728907.9 | 4587270.2 |                                                             | 120       |
|                    | MRT-02 | 728982.0 | 4587179.2 | Bare soil                                                   | 140       |
|                    | MRT-03 | 729074.5 | 4587058.7 |                                                             | 160       |
| <b>Pez</b>         | PEZ-01 | 729086.5 | 4584561.7 |                                                             | 180       |
|                    | PEZ-02 | 729147.5 | 4584590.3 | Bare soil                                                   | 180       |
|                    | PEZ-03 | 729179.1 | 4584599.0 |                                                             | 200       |
| <b>Piñol</b>       | PNL-01 | 729373.4 | 4587926.2 |                                                             | 160       |
|                    | PNL-02 | 729461.5 | 4587891.2 | Bare soil                                                   | 160       |
|                    | PNL-03 | 729568.0 | 4587859.0 |                                                             | 160       |
| <b>Rebollón</b>    | RBL-01 | 725492.5 | 4584433.4 |                                                             | 100       |
|                    | RBL-02 | 725580.6 | 4584398.3 | Bare soil                                                   | 60        |
|                    | RBL-03 | 725641.8 | 4584370.2 |                                                             | 80        |

.../...

S1 Table 1. (continued).

| Wetland | Site   | Coord. X | Coord. Y  | Vegetation                               | Depth, cm |
|---------|--------|----------|-----------|------------------------------------------|-----------|
| Rollo   | RLL-01 | 726009.0 | 4585867.0 | Bare soil                                | 100       |
|         | RLL-03 | 726263.0 | 4585720.0 |                                          | 100       |
|         | RLL-04 | 726345.0 | 4585663.0 | <i>Arthrocnemum macrostachyum</i>        | 120       |
|         | RLL-05 | 726384.0 | 4585639.0 |                                          | 120       |
|         | RLL-06 | 726418.0 | 4585611.0 | <i>A. macrostachyum</i> + <i>S. vera</i> | 80        |
|         | RLL-07 | 726437.0 | 4585607.0 |                                          | 100       |
|         | RLL-08 | 726485.0 | 4585581.0 |                                          | 60        |
|         | RLL-09 | 726528.0 | 4585555.0 |                                          | 60        |
|         | RLL-10 | 726572.0 | 4585536.0 | Winter cereal                            | 100       |
|         | RLL-11 | 726594.0 | 4585522.0 |                                          | 80        |
|         | RLL-12 | 726649.0 | 4585488.0 |                                          | 100       |
|         | RLL-13 | 726701.0 | 4585463.0 |                                          | 40        |
