# Supplementary material for: Two Fixed Ratio Dilutions for Soil Salinity Monitoring in Hypersaline Wetlands
Source: PubMed Central journal article supplement (PMC4441515; doi:10.1371/journal.pone.0126493), 2015-05-22
Supplement: pone.0126493.s002.pdf [file pone.0126493.s002.pdf]

**S2 Table. Analytical data of the soil samples.**

| Soil sample | EC1:5<br>dS m <sup>-1</sup> | EC1:10<br>dS m <sup>-1</sup> | Cl1:10<br>meq L <sup>-1</sup> | ECe<br>dS m <sup>-1</sup> | SP<br>% | Gypsum<br>% | CCE<br>% |
|-------------|-----------------------------|------------------------------|-------------------------------|---------------------------|---------|-------------|----------|
| AMA-1/1     | 13.25                       | 8.07                         |                               | 76.10                     | 54      | 60.0        | 16.7     |
| AMA-1/2     | 10.37                       | 6.60                         |                               | 56.60                     | 58      | 81.2        | 7.1      |
| AMA-1/3     | 11.68                       | 7.21                         |                               | 62.40                     | 59      | 78.8        | 8.2      |
| AMA-1/4     | 14.89                       | 8.70                         |                               | 85.00                     | 52      | 70.8        | 12.9     |
| AMA-1/5     | 12.97                       | 7.87                         |                               | 81.50                     | 50      | 74.4        | 11.2     |
| AMA-1/6     | 13.05                       | 7.89                         |                               | 82.30                     | 48      | 75.0        | 8.1      |
| AMA-1/7     | 11.13                       | 6.99                         |                               | 88.80                     | 37      | 87.1        | 5.1      |
| AMA-1/8     | 13.25                       | 8.07                         |                               | 99.30                     | 37      | 75.6        | 9.7      |
| AMA-2/1     | 13.35                       | 8.38                         |                               | 68.10                     | 67      | 58.2        | 17.0     |
| AMA-2/2     | 9.96                        | 6.31                         |                               | 49.50                     | 63      | 78.8        | 8.7      |
| AMA-2/3     | 9.76                        | 6.10                         |                               | 67.70                     | 44      | 89.4        | 3.3      |
| AMA-2/4     | 9.48                        | 6.03                         |                               | 70.00                     | 41      | 91.3        | 2.1      |
| AMA-2/5     | 10.94                       | 7.05                         |                               | 80.20                     | 41      | 88.3        | 2.0      |
| AMA-2/6     | 10.10                       | 6.47                         |                               | 77.30                     | 42      | 85.2        | 2.3      |
| AMA-2/7     | 10.64                       | 6.78                         |                               | 78.00                     | 39      | 81.1        | 2.2      |
| AMA-2/8     | 10.28                       | 6.54                         |                               | 86.20                     | 32      | 84.5        | 2.7      |
| AMA-3/1     | 10.57                       | 6.73                         |                               | 74.50                     | 40      | 66.8        | 11.9     |
| AMA-3/2     | 10.46                       | 6.66                         |                               | 82.40                     | 38      | 89.6        | 3.6      |
| AMA-3/3     | 10.26                       | 6.36                         |                               | 86.50                     | 36      | 93.4        | 2.2      |
| AMA-3/4     | 10.43                       | 6.60                         |                               | 92.80                     | 24      | 76.0        | 14.0     |
| AMA-3/5     | 6.09                        | 4.28                         |                               | 64.30                     | 30      | 65.9        | 29.9     |
| AMA-3/6     | 8.74                        | 5.66                         |                               | 84.80                     | 28      | 69.4        | 16.3     |
| AMA-4/1     | 2.51                        | 2.36                         |                               | 4.52                      | 41      | 48.1        | 19.5     |
| AMA-4/2     | 3.12                        | 2.78                         |                               | 8.37                      | 45      | 44.5        | 21.9     |
| AMA-4/3     | 4.00                        | 3.13                         |                               | 13.60                     | 47      | 26.7        | 35.5     |
| AMA-4/4     | 3.88                        | 3.07                         |                               | 13.39                     | 52      | 25.6        | 41.5     |
| AMA-4/5     | 3.60                        | 2.91                         |                               | 13.80                     | 42      | 70.4        | 19.1     |
| AMA-4/6     | 3.04                        | 2.62                         |                               | 10.52                     | 36      | 77.2        | 11.5     |
| AMA-5/1     | 2.56                        | 2.01                         |                               | 5.41                      | 50      | 6.6         | 38.4     |
| AMA-5/2     | 4.17                        | 2.82                         |                               | 17.39                     | 52      | 7.9         | 45.8     |
| AMB-1/1     | 11.77                       | 7.24                         |                               | 49.10                     | 44      | 60.3        | 18.4     |
| AMB-1/2     | 6.60                        | 4.50                         |                               | 74.70                     | 48      | 84.1        | 6.2      |
| AMB-1/3     | 6.27                        | 4.32                         |                               | 43.90                     | 36      | 85.8        | 4.3      |
| AMB-1/4     | 6.34                        | 4.34                         |                               | 44.60                     | 31      | 89.5        | 2.7      |
| AMB-1/5     | 5.94                        | 4.08                         |                               | 40.80                     | 35      | 55.7        | 15.4     |
| AMB-1/6     | 5.63                        | 3.72                         |                               | 29.23                     | 47      | 30.3        | 22.6     |
| AMB-02/1    | 9.37                        | 6.02                         |                               | 60.30                     | 50      | 76.5        | 5.9      |
| AMB-02/2    | 7.73                        | 5.14                         |                               | 63.00                     | 41      | 86.4        | 2.3      |
| AMB-02/3    | 7.04                        | 4.62                         |                               | 55.30                     | 37      | 89.4        | 0.5      |
| AMB-02/4    | 8.47                        | 5.49                         |                               | 65.00                     | 35      | 83.8        | 1.1      |
| AMB-02/5    | 8.88                        | 5.67                         |                               | 68.20                     | 35      | 81.0        | 3.0      |
| AMB-02/6    | 8.99                        | 5.71                         |                               | 33.90                     | 36      | 61.6        | 18.6     |

| Soil sample | EC1:5<br>dS m <sup>-1</sup> | EC1:10<br>dS m <sup>-1</sup> | Cl1:10<br>meq L <sup>-1</sup> | ECe<br>dS m <sup>-1</sup> | SP<br>% | Gypsum<br>% | CCE<br>% |
|-------------|-----------------------------|------------------------------|-------------------------------|---------------------------|---------|-------------|----------|
| AMB-02/7    | 7.04                        | 4.46                         |                               | 53.10                     | 34      | 34.7        | 40.5     |
| AMB-3/1     | 10.90                       | 6.89                         |                               | 83.30                     | 39      | 82.9        | 4.2      |
| AMB-3/2     | 10.57                       | 6.59                         |                               | 90.40                     | 31      | 86.6        | 1.0      |
| AMB-3/3     | 10.62                       | 6.45                         |                               | 94.00                     | 29      | 86.4        | 1.6      |
| AMB-3/4     | 10.86                       | 6.73                         |                               | 95.40                     | 31      | 83.9        | 1.5      |
| AMB-3/5     | 9.29                        | 5.82                         |                               | 82.90                     | 32      | 84.1        | 1.5      |
| AMB-3/6     | 9.68                        | 6.13                         |                               | 92.20                     | 28      | 63.0        | 17.3     |
| AMB-3/7     | 10.07                       | 6.20                         |                               | 74.60                     | 41      | 21.0        | 46.3     |
| AMB-3/8     | 9.35                        | 5.38                         |                               | 58.40                     | 52      | 9.7         | 51.9     |
| AMB-4/1     | 7.23                        | 5.01                         |                               | 41.70                     | 48      | 35.9        | 26.4     |
| AMB-4/2     | 7.67                        | 5.25                         |                               | 53.60                     | 39      | 54.5        | 17.7     |
| AMB-4/3     | 6.04                        | 4.32                         |                               | 42.60                     | 37      | 80.4        | 7.9      |
| AMB-4/4     | 5.54                        | 4.01                         |                               | 37.20                     | 34      | 85.3        | 6.3      |
| AMB-4/5     | 5.16                        | 3.82                         |                               | 36.00                     | 33      | 84.5        | 5.5      |
| AMB-4/6     | 5.15                        | 3.71                         |                               | 37.80                     | 31      | 87.1        | 4.7      |
| AMB-4/7     | 4.94                        | 3.63                         |                               | 32.80                     | 33      | 83.8        | 5.3      |
| AMB-4/8     | 4.16                        | 3.19                         |                               | 25.30                     | 34      | 88.2        | 3.8      |
| AMB-5/1     | 2.28                        | 2.18                         |                               | 3.53                      | 29      | 7.9         | 48.3     |
| AMB-5/2     | 2.96                        | 2.55                         |                               | 7.66                      | 33      | 8.4         | 46.3     |
| AMB-5/3     | 3.50                        | 2.96                         |                               | 11.10                     | 38      | 31.4        | 38.8     |
| AMB-5/4     | 3.02                        | 2.67                         |                               | 8.93                      | 45      | 56.7        | 29.2     |
| AMB-5/5     | 2.80                        | 2.57                         |                               | 7.70                      | 40      | 36.1        | 43.6     |
| AMB-5/6     | 2.73                        | 2.53                         |                               | 7.35                      | 42      | 19.8        | 57.7     |
| AMB-6/1     | 2.41                        | 2.30                         |                               | 4.24                      | 34      | 77.9        | 7.7      |
| AMB-6/2     | 2.49                        | 2.35                         |                               | 5.13                      | 31      | 85.4        | 4.4      |
| AMB-6/3     | 2.53                        | 2.37                         |                               | 6.10                      | 30      | 88.2        | 5.8      |
| AMB-6/4     | 2.53                        | 2.36                         |                               | 5.97                      | 30      | 88.6        | 5.7      |
| AMB-6/5     | 2.41                        | 2.30                         |                               | 4.97                      | 30      | 94.2        | 3.8      |
| AMB-6/6     | 5.43                        | 3.95                         |                               | 45.20                     | 30      | 69.9        | 22.7     |
| CMR-01/01   | 24.20                       | 14.01                        | 111.30                        | 132.00                    | 57      | 28.9        | 14.6     |
| CMR-01/02   | 21.10                       | 13.04                        | 104.80                        | 111.10                    | 62      | 26.9        | 14.0     |
| CMR-01/03   | 16.10                       | 9.86                         | 69.10                         | 111.40                    | 45      | 46.4        | 14.0     |
| CMR-01/04   | 15.50                       | 9.20                         | 64.10                         | 124.50                    | 32      | 53.4        | 12.8     |
| CMR-01/05   | 13.20                       | 8.01                         | 53.80                         | 124.50                    | 28      | 41.5        | 34.3     |
| CMR-01/06   | 14.00                       | 8.31                         | 57.00                         | 137.00                    | 25      | 51.5        | 31.9     |
| CMR-01/07   | 16.70                       | 9.94                         | 70.70                         | 162.00                    | 23      |             |          |
| CMR-02/01   | 22.00                       | 12.69                        | 97.40                         | 126.90                    | 51      | 38.0        | 14.2     |
| CMR-02/02   | 18.90                       | 11.16                        | 79.50                         | 109.10                    | 55      | 37.9        | 11.9     |
| CMR-02/03   | 17.80                       | 10.49                        | 74.50                         | 105.20                    | 48      | 47.3        | 8.6      |
| CMR-02/04   | 16.20                       | 9.58                         | 67.30                         | 183.00                    | 36      | 58.7        | 5.6      |
| CMR-02/05   | 16.70                       | 10.23                        | 73.60                         | 122.80                    | 40      | 59.1        | 6.0      |
| CMR-02/06   | 18.20                       | 10.80                        | 77.60                         | 130.00                    | 41      | 56.6        | 6.5      |
| CMR-02/07   | 17.80                       | 10.29                        | 74.60                         | 127.90                    | 41      | 44.8        | 13.0     |
| CMR-02/08   | 19.10                       | 10.31                        | 73.00                         | 115.70                    | 47      | 30.3        | 21.4     |

| <b>Soil sample</b> | <b>EC1:5<br/>dS m<sup>-1</sup></b> | <b>EC1:10<br/>dS m<sup>-1</sup></b> | <b>Cl1:10<br/>meq L<sup>-1</sup></b> | <b>ECe<br/>dS m<sup>-1</sup></b> | <b>SP<br/>%</b> | <b>Gypsum<br/>%</b> | <b>CCE<br/>%</b> |
|--------------------|------------------------------------|-------------------------------------|--------------------------------------|----------------------------------|-----------------|---------------------|------------------|
| CMR-02/09          | 18.60                              | 11.15                               | 83.00                                | 94.80                            | 47              | 40.9                | 18.7             |
| CMR-02/10          | 14.60                              | 8.73                                | 61.60                                | 101.60                           | 43              | 46.8                | 15.3             |
| CMR-03/01          | 23.60                              | 14.00                               | 106.90                               | 144.00                           | 46              | 38.8                | 13.3             |
| CMR-03/02          | 20.20                              | 11.82                               | 86.20                                | 123.40                           | 48              | 44.1                | 10.6             |
| CMR-03/03          | 17.00                              | 9.81                                | 68.90                                | 109.80                           | 45              | 52.5                | 8.2              |
| CMR-03/04          | 13.70                              | 8.31                                | 54.90                                | 125.30                           | 29              | 71.1                | 3.5              |
| CMR-03/05          | 15.20                              | 9.09                                | 61.70                                | 119.00                           | 36              | 63.7                | 4.1              |
| CMR-03/06          | 15.70                              | 9.42                                | 66.00                                | 120.30                           | 38              | 60.9                | 4.5              |
| CMR-03/07          | 13.20                              | 8.40                                | 55.90                                | 109.90                           | 35              | 54.1                | 9.4              |
| CMR-03/08          | 14.80                              | 9.02                                | 60.00                                | 87.40                            | 46              | 34.4                | 20.6             |
| CMR-03/09          | 15.70                              | 9.22                                | 62.90                                | 106.20                           | 44              | 37.7                | 19.9             |
| GLR-01/01          | 28.40                              | 16.20                               | 126.90                               | 139.00                           | 56              | 48.8                | 16.7             |
| GLR-01/02          | 23.70                              | 14.20                               | 109.30                               | 138.00                           | 55              | 42.9                | 19.3             |
| GLR-01/03          | 14.60                              | 9.07                                | 59.50                                | 102.00                           | 40              | 48.1                | 16.9             |
| GLR-01/04          | 14.00                              | 8.71                                | 55.00                                | 100.40                           | 39              | 57.4                | 10.1             |
| GLR-01/05          | 10.00                              | 6.24                                | 33.50                                | 93.80                            | 27              | 65.9                | 8.6              |
| GLR-01/06          | 9.74                               | 6.08                                | 32.50                                | 96.80                            | 30              | 60.5                | 26.8             |
| GLR-01/07          | 9.58                               | 6.28                                | 36.80                                | 98.00                            | 25              | 15.2                | 72.6             |
| GLR-02/01          | 21.50                              | 13.10                               | 95.80                                | 121.30                           | 52              | 59.8                | 10.9             |
| GLR-02/02          | 22.30                              | 12.50                               | 91.60                                | 117.00                           | 49              | 60.9                | 7.9              |
| GLR-02/03          | 15.90                              | 9.12                                | 60.90                                | 127.40                           | 32              | 75.8                | 3.5              |
| GLR-02/04          | 13.30                              | 8.11                                | 50.20                                | 114.20                           | 30              | 75.7                | 2.5              |
| GLR-02/05          | 14.30                              | 8.62                                | 58.02                                | 112.50                           | 33              | 76.9                | 2.2              |
| GLR-02/06          | 13.80                              | 8.35                                | 51.10                                | 109.40                           | 32              | 78.2                | 1.9              |
| GLR-02/07          | 17.50                              | 9.80                                | 65.50                                | 125.70                           | 38              | 66.7                | 3.0              |
| GLR-02/08          | 15.60                              | 9.25                                | 61.70                                | 123.50                           | 32              | 76.3                | 1.9              |
| GLR-02/09          | 14.30                              | 8.58                                | 57.27                                | 125.50                           | 25              | 76.7                | 2.3              |
| GLR-02/10          | 12.58                              | 8.20                                | 52.40                                | 119.60                           | 27              | 80.0                | 4.7              |
| GLR-02/11          | 12.66                              | 7.37                                | 44.30                                | 106.20                           | 33              | 73.2                | 10.4             |
| GLR-02/12          | 11.76                              | 7.17                                | 41.00                                | 123.40                           | 29              | 70.2                | 13.0             |
| GLR-02/13          | 13.70                              | 8.18                                | 52.10                                | 109.70                           | 33              | 17.4                | 57.4             |
| GLR-03/01          | 18.30                              | 9.91                                | 67.20                                | 138.00                           | 31              | 69.9                | 9.9              |
| GLR-03/02          | 16.90                              | 10.22                               | 68.70                                | 132.00                           | 33              | 66.3                | 9.5              |
| GLR-03/03          | 12.60                              | 8.28                                | 51.80                                | 118.60                           | 26              | 73.5                | 6.0              |
| GLR-03/04          | 11.04                              | 7.13                                | 40.80                                | 111.20                           | 23              | 76.4                | 3.2              |
| GLR-03/05          | 10.18                              | 6.49                                | 36.00                                | 121.00                           | 21              | 77.6                | 0.7              |
| GLR-03/06          | 10.69                              | 6.45                                | 37.00                                | 108.90                           | 21              | 71.3                | 2.1              |
| GLR-04/01          | 8.63                               | 5.66                                | 28.80                                | 73.30                            | 31              | 73.6                | 12.4             |
| GLR-04/02          | 9.12                               | 5.51                                | 27.40                                | 74.70                            | 30              | 76.6                | 10.2             |
| GLR-04/03          | 7.65                               | 5.01                                | 22.30                                | 60.60                            | 34              | 78.1                | 8.1              |
| GLR-04/04          | 6.11                               | 4.26                                | 18.00                                | 49.20                            | 31              | 90.3                | 4.1              |
| GLR-04/05          | 7.12                               | 4.62                                | 21.00                                | 62.80                            | 30              | 62.8                | 7.7              |
| GLR-04/06          | 7.78                               | 5.18                                | 23.70                                | 68.20                            | 29              | 82.6                | 7.0              |
| GLR-04/07          | 8.19                               | 5.52                                | 27.30                                | 78.20                            | 28              | 86.5                | 4.8              |

| Soil sample | EC1:5<br>dS m <sup>-1</sup> | EC1:10<br>dS m <sup>-1</sup> | Cl1:10<br>meq L <sup>-1</sup> | ECe<br>dS m <sup>-1</sup> | SP<br>% | Gypsum<br>% | CCE<br>% |
|-------------|-----------------------------|------------------------------|-------------------------------|---------------------------|---------|-------------|----------|
| GLR-04/08   | 8.64                        | 5.50                         | 26.80                         | 74.80                     | 29      | 76.5        | 12.5     |
| GLR-04/09   | 7.56                        | 5.00                         | 22.80                         | 72.80                     | 25      | 51.6        | 32.0     |
| GLR-04/10   | 7.89                        | 5.17                         | 25.40                         | 78.90                     | 24      | 29.6        | 60.4     |
| GLR-05/1    | 10.84                       | 6.57                         | 35.80                         | 60.50                     | 54      | 8.4         | 34.3     |
| GLR-05/2    | 10.02                       | 6.32                         | 29.70                         | 62.30                     | 44      | 20.0        | 33.0     |
| GLR-05/3    | 9.23                        | 5.94                         | 28.80                         | 60.70                     | 42      | 34.7        | 25.5     |
| GLR-05/4    | 7.52                        | 4.93                         | 20.30                         | 58.80                     | 34      | 58.5        | 15.1     |
| GLR-05/5    | 8.01                        | 5.12                         | 23.20                         | 68.00                     | 34      | 68.7        | 10.9     |
| GLR-05/6    | 7.80                        | 4.92                         | 21.50                         | 67.60                     | 29      | 80.2        | 7.8      |
| GLR-05/7    | 6.54                        | 3.97                         | 13.70                         | 66.30                     | 25      | 63.6        | 28.5     |
| GLR-05/8    | 6.35                        | 4.28                         | 16.60                         | 73.90                     | 24      | 56.6        | 37.8     |
| GLR-05/9    | 5.69                        | 3.88                         | 13.80                         | 61.60                     | 23      | 75.1        | 22.2     |
| GLR-06/1    | 3.90                        | 3.03                         | 7.20                          | 16.00                     | 44      | 10.7        | 44.1     |
| GLR-06/2    | 4.54                        | 3.42                         | 8.70                          | 21.40                     | 45      | 13.1        | 47.5     |
| GLR-06/3    | 4.45                        | 3.38                         | 8.90                          | 21.50                     | 41      | 17.3        | 55.5     |
| GLR-07/1    | 6.02                        | 4.17                         | 14.10                         | 33.20                     | 44      | 34.1        | 30.3     |
| GLR-07/2    | 7.90                        | 5.18                         | 19.90                         | 50.80                     | 41      | 32.2        | 33.8     |
| GLR-07/3    | 7.50                        | 5.00                         | 20.20                         | 58.30                     | 32      | 57.4        | 22.6     |
| GLR-07/4    | 7.50                        | 5.24                         | 22.50                         | 61.80                     | 32      | 47.2        | 28.7     |
| GLR-07/5    | 8.19                        | 5.09                         | 21.70                         | 54.10                     | 37      | 28.9        | 50.9     |
| GLR-07/6    | 8.54                        | 5.40                         | 25.90                         | 54.60                     | 43      | 43.0        | 33.2     |
| GLR-07/7    | 4.37                        | 3.34                         | 10.00                         | 39.60                     | 24      | 91.3        | 5.5      |
| GLR-07/8    | 4.36                        | 3.27                         | 10.80                         | 33.20                     | 26      | 96.4        | 3.1      |
| GLR-08/1    | 3.47                        | 2.76                         | 5.20                          | 12.00                     | 45      | 9.8         | 50.1     |
| GLR-08/2    | 4.36                        | 3.30                         | 7.80                          | 18.40                     | 45      | 36.8        | 41.2     |
| GLR-08/3    | 4.35                        | 3.31                         | 7.00                          | 21.00                     | 42      | 43.9        | 39.1     |
| GLR-08/4    | 3.93                        | 3.06                         | 6.20                          | 18.80                     | 37      | 8.8         | 47.1     |
| GLR-09/1    | 2.88                        | 2.47                         | 3.50                          | 7.61                      | 43      | 5.9         | 53.0     |
| GLR-09/2    | 3.37                        | 2.65                         | 3.10                          | 11.71                     | 43      | 5.7         | 56.1     |
| GLR-09/3    | 3.60                        | 2.86                         | 3.90                          | 13.60                     | 43      | 7.0         | 53.9     |
| GLR-09/4    | 3.53                        | 2.87                         | 3.80                          | 13.40                     | 42      | 20.0        | 46.9     |
| GLR-10/01   | 1.69                        | 0.97                         | 2.60                          | 6.21                      | 44      | 2.9         | 55.9     |
| GLR-10/02   | 3.10                        | 2.38                         | 2.30                          | 9.17                      | 44      | 4.6         | 56.6     |
| GLR-10/03   | 3.10                        | 2.64                         | 2.90                          | 10.73                     | 38      | 9.3         | 67.1     |
| GLR-10/04   | 2.77                        | 2.49                         | 2.00                          | 8.60                      | 30      | 75.5        | 18.7     |
| GRM-01/1    | 0.41                        | 0.33                         | 2.20                          | 2.32                      | 38      | 1.9         | 51.2     |
| GRM-01/2    | 0.86                        | 0.58                         | 1.90                          | 2.98                      | 44      | 2.1         | 51.8     |
| GRM-01/3    | 1.00                        | 0.64                         | 2.90                          | 4.04                      | 47      | 1.9         | 57.4     |
| GRM-01/4    | 2.66                        | 2.39                         | 1.10                          | 5.19                      | 36      | 39.2        | 37.9     |
| GRM-02/1    | 1.40                        | 0.80                         | 1.00                          | 3.08                      | 41      | 2.6         | 52.6     |
| GRM-02/2    | 2.03                        | 1.49                         | 0.90                          | 4.62                      | 44      | 3.5         | 51.0     |
| GRM-02/3    | 2.55                        | 1.47                         | 0.50                          | 6.06                      | 45      | 2.6         | 59.9     |
| GRM-02/4    | 2.89                        | 2.31                         | 0.60                          | 6.32                      | 43      | 4.3         | 62.3     |
| GRM-03/1    | 3.03                        | 1.93                         | 2.90                          | 8.63                      | 45      | 3.3         | 57.6     |

| Soil sample | EC1:5<br>dS m <sup>-1</sup> | EC1:10<br>dS m <sup>-1</sup> | Cl1:10<br>meq L <sup>-1</sup> | ECe<br>dS m <sup>-1</sup> | SP<br>% | Gypsum<br>% | CCE<br>% |
|-------------|-----------------------------|------------------------------|-------------------------------|---------------------------|---------|-------------|----------|
| GRM-03/2    | 3.54                        | 2.85                         | 4.10                          | 12.80                     | 43      | 6.5         | 57.5     |
| GRM-03/3    | 3.53                        | 2.91                         | 6.10                          | 17.00                     | 33      | 58.4        | 24.5     |
| GRM-03/4    | 3.89                        | 3.05                         | 6.70                          | 24.00                     | 28      | 56.0        | 28.1     |
| GRM-04/1    | 8.51                        | 5.48                         | 24.30                         | 54.60                     | 39      | 12.7        | 41.0     |
| GRM-04/2    | 7.75                        | 4.98                         | 20.70                         | 51.70                     | 37      | 11.7        | 49.4     |
| GRM-04/3    | 5.86                        | 4.53                         | 17.60                         | 50.70                     | 29      | 47.2        | 30.1     |
| GRM-05/1    | 4.06                        | 3.02                         | 5.90                          | 14.30                     | 49      | 8.6         | 39.6     |
| GRM-05/2    | 5.30                        | 3.78                         | 10.40                         | 25.10                     | 45      | 15.0        | 40.4     |
| GRM-05/3    | 4.51                        | 3.38                         | 8.70                          | 23.80                     | 37      | 65.7        | 15.8     |
| GRM-05/4    | 5.11                        | 3.68                         | 10.20                         | 26.10                     | 43      | 58.4        | 17.1     |
| GRM-05/5    | 5.33                        | 3.74                         | 11.30                         | 30.80                     | 39      | 64.6        | 12.3     |
| GRM-05/6    | 5.71                        | 4.00                         | 12.50                         | 32.90                     | 40      | 58.5        | 15.9     |
| GRM-06/1    | 6.50                        | 4.35                         | 15.90                         | 32.40                     | 49      | 13.1        | 35.6     |
| GRM-06/2    | 9.11                        | 5.80                         | 28.00                         | 51.20                     | 46      | 25.8        | 33.5     |
| GRM-06/3    | 6.96                        | 5.03                         | 20.90                         | 51.70                     | 34      | 68.5        | 13.1     |
| GRM-06/4    | 8.25                        | 5.51                         | 25.10                         | 53.90                     | 42      | 57.7        | 16.0     |
| GRM-06/5    | 7.85                        | 4.91                         | 20.50                         | 60.30                     | 33      | 68.5        | 9.6      |
| GRM-06/6    | 8.61                        | 5.46                         | 23.70                         | 62.20                     | 38      | 60.2        | 17.8     |
| GRM-07/1    | 3.65                        | 2.79                         | 3.50                          | 10.84                     | 48      | 9.6         | 37.5     |
| GRM-07/2    | 6.88                        | 4.61                         | 19.70                         | 40.90                     | 41      | 52.0        | 22.6     |
| GRM-07/3    | 6.96                        | 4.65                         | 20.30                         | 49.50                     | 34      | 74.2        | 9.4      |
| GRM-07/4    | 6.50                        | 4.36                         | 17.30                         | 52.70                     | 29      | 76.6        | 5.3      |
| GRM-07/5    | 6.78                        | 4.61                         | 18.60                         | 46.60                     | 36      | 66.2        | 9.9      |
| GRM-07/6    | 7.41                        | 5.16                         | 21.40                         | 49.90                     | 37      | 58.1        | 15.4     |
| GRM-08/1    | 5.37                        | 3.87                         | 12.20                         | 24.00                     | 48      | 10.5        | 34.9     |
| GRM-08/2    | 8.49                        | 5.65                         | 27.90                         | 54.70                     | 41      | 75.3        | 21.9     |
| GRM-08/3    | 8.35                        | 5.74                         | 28.20                         | 67.80                     | 35      | 75.5        | 8.4      |
| GRM-08/4    | 7.48                        | 5.22                         | 24.30                         | 60.90                     | 31      | 75.4        | 6.9      |
| GRM-08/5    | 7.91                        | 5.33                         | 24.50                         | 66.70                     | 30      | 76.4        | 5.9      |
| GRM-08/6    | 9.64                        | 6.73                         | 33.40                         | 57.80                     | 43      | 42.6        | 21.7     |
| GRM-09/1    | 4.07                        | 3.08                         | 6.40                          | 14.60                     | 51      | 10.4        | 35.8     |
| GRM-09/2    | 8.90                        | 5.70                         | 27.40                         | 53.00                     | 46      | 30.2        | 32.9     |
| GRM-09/3    | 8.02                        | 5.18                         | 22.80                         | 64.70                     | 35      | 73.6        | 9.7      |
| GRM-09/4    | 8.62                        | 5.62                         | 26.80                         | 66.60                     | 35      | 68.7        | 10.5     |
| GRM-09/5    | 7.91                        | 4.97                         | 21.80                         | 71.50                     | 28      | 76.8        | 6.5      |
| GRM-09/6    | 8.98                        | 5.75                         | 27.80                         | 64.90                     | 35      | 63.1        | 12.6     |
| GRM-10/1    | 4.82                        | 3.42                         | 9.10                          | 27.20                     | 38      | 22.3        | 41.6     |
| GRM-10/2    | 5.88                        | 4.12                         | 15.20                         | 49.10                     | 25      | 60.0        | 27.0     |
| GRM-10/3    | 5.69                        | 3.91                         | 14.00                         | 50.70                     | 25      | 35.7        | 46.6     |
| GRM-10/4    | 4.35                        | 3.36                         | 10.00                         | 56.80                     | 24      | 36.2        | 50.5     |
| GRM-10/5    | 6.30                        | 4.09                         | 14.70                         | 48.20                     | 29      | 63.0        | 23.6     |
| GRM-10/6    | 6.71                        | 4.50                         | 17.00                         | 29.90                     | 61      | 20.2        | 38.8     |
| GRM-11/1    | 5.43                        | 3.75                         | 13.40                         | 27.40                     | 46      | 7.0         | 51.7     |
| GRM-11/2    | 6.11                        | 4.30                         | 16.70                         | 33.70                     | 45      | 28.9        | 40.7     |

| Soil sample | EC1:5<br>dS m <sup>-1</sup> | EC1:10<br>dS m <sup>-1</sup> | Cl1:10<br>meq L <sup>-1</sup> | ECe<br>dS m <sup>-1</sup> | SP<br>% | Gypsum<br>% | CCE<br>% |
|-------------|-----------------------------|------------------------------|-------------------------------|---------------------------|---------|-------------|----------|
| GRM-11/3    | 5.51                        | 3.95                         | 14.30                         | 34.10                     | 39      | 62.1        | 27.5     |
| GRM-11/4    | 5.33                        | 3.84                         | 13.70                         | 38.70                     | 30      | 52.1        | 25.4     |
| GRM-11/5    | 5.02                        | 3.74                         | 13.00                         | 37.20                     | 29      | 56.5        | 34.9     |
| MRT-01/1    | 20.60                       | 12.73                        | 94.70                         | 147.00                    | 36      | 58.4        | 14.0     |
| MRT-01/2    | 23.00                       | 14.00                        | 107.10                        | 154.00                    | 36      | 58.1        | 13.0     |
| MRT-01/3    | 19.60                       | 12.59                        | 94.80                         | 125.70                    | 40      | 38.2        | 23.4     |
| MRT-01/4    | 15.90                       | 9.61                         | 64.00                         | 114.90                    | 39      | 41.3        | 23.0     |
| MRT-01/5    | 23.80                       | 12.99                        | 97.80                         | 144.00                    | 43      | 21.2        | 40.6     |
| MRT-01/6    | 25.00                       | 13.20                        | 103.80                        | 158.00                    | 38      | 15.0        | 53.0     |
| MRT-02/1    | 25.50                       | 14.90                        | 112.70                        | 136.00                    | 48      | 59.7        | 11.5     |
| MRT-02/2    | 22.90                       | 13.60                        | 107.80                        | 152.00                    | 39      | 61.9        | 11.0     |
| MRT-02/3    | 22.30                       | 12.82                        | 98.10                         | 135.00                    | 43      | 51.8        | 14.4     |
| MRT-02/4    | 17.40                       | 10.46                        | 72.20                         | 133.00                    | 34      | 51.2        | 18.1     |
| MRT-02/5    | 16.80                       | 10.18                        | 70.50                         | 139.00                    | 32      | 48.1        | 20.4     |
| MRT-02/6    | 17.00                       | 10.02                        | 69.50                         | 127.10                    | 35      | 52.9        | 18.4     |
| MRT-02/7    | 18.80                       | 11.04                        | 79.50                         | 146.00                    | 29      | 39.0        | 35.5     |
| MRT-03/1    | 20.50                       | 12.42                        | 93.10                         | 163.00                    | 27      | 79.0        | 7.3      |
| MRT-03/2    | 18.40                       | 10.89                        | 79.10                         | 144.00                    | 31      | 73.3        | 8.2      |
| MRT-03/3    | 17.40                       | 10.42                        | 71.80                         | 126.70                    | 35      | 74.3        | 7.3      |
| MRT-03/4    | 18.30                       | 10.00                        | 67.70                         | 131.00                    | 33      | 64.8        | 11.9     |
| MRT-03/5    | 16.80                       | 9.84                         | 65.20                         | 132.00                    | 32      | 51.9        | 17.1     |
| MRT-03/6    | 17.20                       | 10.25                        | 71.40                         | 135.00                    | 33      | 54.7        | 17.0     |
| MRT-03/7    | 19.20                       | 11.05                        | 78.80                         | 129.70                    | 39      | 45.7        | 20.4     |
| MRT-03/8    | 19.00                       | 11.25                        | 80.50                         | 122.40                    | 43      | 46.8        | 19.8     |
| PEZ-01/1    | 18.70                       | 10.96                        | 80.50                         | 119.00                    | 44      | 28.9        | 29.0     |
| PEZ-01/2    | 15.10                       | 9.05                         | 62.70                         | 96.70                     | 49      | 33.2        | 24.3     |
| PEZ-01/3    | 16.90                       | 9.69                         | 70.60                         | 106.70                    | 49      | 38.0        | 24.8     |
| PEZ-01/4    | 16.30                       | 9.43                         | 67.30                         | 96.10                     | 49      | 34.4        | 29.1     |
| PEZ-01/5    | 15.30                       | 9.30                         | 65.40                         | 92.60                     | 50      | 33.9        | 26.9     |
| PEZ-01/6    | 19.30                       | 11.53                        | 89.10                         | 82.00                     | 49      | 35.3        | 27.9     |
| PEZ-01/7    | 12.74                       | 7.81                         | 51.10                         | 82.00                     | 47      | 36.6        | 25.6     |
| PEZ-01/8    | 12.80                       | 7.95                         | 51.25                         | 138.00                    | 42      | 36.9        | 26.8     |
| PEZ-01/9    | 18.30                       | 10.97                        | 82.90                         | 129.70                    | 40      |             |          |
| PEZ-02/1    | 16.90                       | 10.33                        | 74.90                         | 106.70                    | 47      | 35.5        | 22.6     |
| PEZ-02/2    | 15.10                       | 9.43                         | 66.50                         | 104.30                    | 42      | 49.6        | 16.6     |
| PEZ-02/3    | 11.88                       | 7.36                         | 45.70                         | 92.40                     | 44      | 46.3        | 22.2     |
| PEZ-02/4    | 14.50                       | 7.91                         | 50.60                         | 82.70                     | 45      | 49.1        | 19.0     |
| PEZ-02/5    | 12.72                       | 7.83                         | 50.60                         | 92.50                     | 41      | 53.3        | 18.0     |
| PEZ-02/6    | 12.06                       | 7.39                         | 47.10                         | 95.30                     | 37      | 52.5        | 18.2     |
| PEZ-02/7    | 13.60                       | 8.18                         | 55.50                         | 121.70                    | 28      | 63.5        | 9.9      |
| PEZ-02/8    | 11.50                       | 7.39                         | 47.20                         | 95.00                     | 34      | 46.9        | 21.9     |
| PEZ-02/9    | 14.20                       | 8.86                         | 61.80                         | 112.30                    | 37      | 27.2        | 33.0     |
| PEZ-03/01   | 15.00                       | 9.19                         | 66.40                         | 100.00                    | 43      | 39.6        | 24.2     |
| PEZ-03/02   | 16.30                       | 10.29                        | 74.00                         | 115.20                    | 40      | 46.5        | 19.6     |

| <b>Soil sample</b> | <b>EC1:5<br/>dS m<sup>-1</sup></b> | <b>EC1:10<br/>dS m<sup>-1</sup></b> | <b>Cl1:10<br/>meq L<sup>-1</sup></b> | <b>ECe<br/>dS m<sup>-1</sup></b> | <b>SP<br/>%</b> | <b>Gypsum<br/>%</b> | <b>CCE<br/>%</b> |
|--------------------|------------------------------------|-------------------------------------|--------------------------------------|----------------------------------|-----------------|---------------------|------------------|
| PEZ-03/03          | 13.40                              | 7.25                                | 46.20                                | 101.40                           | 38              | 52.9                | 19.4             |
| PEZ-03/04          | 13.00                              | 7.67                                | 49.80                                | 93.30                            | 40              | 48.2                | 21.6             |
| PEZ-03/05          | 13.10                              | 8.47                                | 56.50                                | 100.60                           | 36              | 52.3                | 19.1             |
| PEZ-03/06          | 13.40                              | 8.40                                | 56.60                                | 108.80                           | 35              | 48.4                | 21.6             |
| PEZ-03/07          | 15.50                              | 9.25                                | 62.80                                | 112.60                           | 36              | 44.7                | 22.5             |
| PEZ-03/08          | 14.00                              | 7.73                                | 49.70                                | 107.70                           | 33              | 40.9                | 27.4             |
| PEZ-03/09          | 13.00                              | 8.07                                | 52.80                                | 106.60                           | 34              | 28.2                | 34.5             |
| PEZ-03/10          | 16.40                              | 9.52                                | 67.20                                | 122.50                           | 36              | 22.9                | 41.0             |
| PNL-01/1           | 18.40                              | 10.52                               | 70.70                                | 113.10                           | 57              | 36.6                | 14.1             |
| PNL-01/2           | 16.90                              | 10.37                               | 67.50                                | 110.20                           | 57              | 29.6                | 16.2             |
| PNL-01/3           | 24.90                              | 14.00                               | 106.90                               | 122.30                           | 61              | 36.0                | 14.5             |
| PNL-01/4           | 28.20                              | 16.30                               | 131.70                               | 90.20                            | 68              | 42.4                | 12.9             |
| PNL-01/5           | 27.70                              | 15.40                               | 124.30                               | 133.00                           | 60              | 37.6                | 15.9             |
| PNL-01/6           | 20.30                              | 11.34                               | 83.50                                | 104.40                           | 50              | 50.7                | 17.6             |
| PNL-01/7           | 10.75                              | 6.87                                | 41.90                                | 96.60                            | 40              | 18.2                | 49.7             |
| PNL-01/8           | 18.00                              | 11.02                               | 85.10                                | 134.00                           | 40              | 6.6                 | 58.6             |
| PNL-02/1           | 17.60                              | 10.52                               | 70.90                                | 121.80                           | 53              | 40.1                | 14.0             |
| PNL-02/2           | 16.90                              | 10.19                               | 67.50                                | 93.90                            | 57              | 33.5                | 15.4             |
| PNL-02/3           | 15.20                              | 10.50                               | 71.10                                | 81.60                            | 64              | 30.0                | 15.9             |
| PNL-02/4           | 15.80                              | 9.30                                | 59.60                                | 92.70                            | 57              | 47.2                | 12.0             |
| PNL-02/5           | 21.80                              | 11.58                               | 83.50                                | 96.80                            | 64              | 41.3                | 13.2             |
| PNL-02/6           | 20.70                              | 11.42                               | 80.80                                | 104.20                           | 65              | 40.7                | 13.5             |
| PNL-02/7           | 18.20                              | 10.65                               | 74.40                                | 115.40                           | 48              | 49.4                | 16.5             |
| PNL-02/8           | 17.90                              | 10.88                               | 78.80                                | 93.10                            | 48              | 46.6                | 19.3             |
| PNL-03/1           | 20.00                              | 11.72                               | 79.10                                | 121.90                           | 50              | 43.1                | 12.0             |
| PNL-03/2           | 15.10                              | 9.26                                | 59.90                                | 104.60                           | 48              | 44.7                | 12.6             |
| PNL-03/3           | 14.50                              | 8.55                                | 54.80                                | 88.80                            | 51              | 47.8                | 11.8             |
| PNL-03/4           | 14.80                              | 8.93                                | 56.60                                | 85.90                            | 55              | 46.2                | 11.0             |
| PNL-03/5           | 15.00                              | 8.96                                | 55.60                                | 87.90                            | 54              | 49.2                | 10.4             |
| PNL-03/6           | 14.80                              | 9.15                                | 60.10                                | 93.40                            | 56              | 48.3                | 10.4             |
| PNL-03/7           | 15.70                              | 9.11                                | 59.00                                | 91.70                            | 54              | 48.0                | 12.2             |
| PNL-03/8           | 18.30                              | 10.14                               | 70.50                                | 117.20                           | 45              | 29.6                | 35.5             |
| RBL-01/1           | 15.90                              | 10.37                               | 75.10                                | 101.60                           | 47              | 21.0                | 26.8             |
| RBL-01/2           | 14.40                              | 7.74                                | 58.90                                | 91.90                            | 52              | 5.3                 | 32.6             |
| RBL-01/3           | 13.90                              | 8.55                                | 58.20                                | 85.70                            | 50              | 12.0                | 33.0             |
| RBL-01/4           | 13.80                              | 8.62                                | 58.50                                | 115.20                           | 32              | 61.0                | 12.0             |
| RBL-01/5           | 13.90                              | 8.49                                | 57.70                                | 99.20                            | 42              | 43.8                | 17.5             |
| RBL-02/1           | 14.10                              | 7.83                                | 48.40                                | 81.90                            | 51              | 20.3                | 31.7             |
| RBL-02/2           | 13.90                              | 8.12                                | 56.20                                | 89.60                            | 45              | 7.5                 | 37.1             |
| RBL-02/3           | 13.90                              | 8.41                                | 54.80                                | 99.40                            | 40              | 45.7                | 20.0             |
| RBL-03/1           | 11.43                              | 7.05                                | 42.00                                | 73.00                            | 44              | 15.2                | 35.9             |
| RBL-03/2           | 13.60                              | 7.48                                | 54.10                                | 83.40                            | 46              | 4.8                 | 39.5             |
| RBL-03/3           | 10.65                              | 7.12                                | 43.80                                | 98.10                            | 33              | 51.7                | 18.4             |
| RBL-03/4           | 12.24                              | 7.48                                | 45.70                                | 99.80                            | 35              | 50.3                | 17.4             |

| Soil sample | EC1:5<br>dS m <sup>-1</sup> | EC1:10<br>dS m <sup>-1</sup> | Cl1:10<br>meq L <sup>-1</sup> | ECe<br>dS m <sup>-1</sup> | SP<br>% | Gypsum<br>% | CCE<br>% |
|-------------|-----------------------------|------------------------------|-------------------------------|---------------------------|---------|-------------|----------|
| RLL-01/1    | 21.90                       | 12.55                        | 95.40                         | 119.50                    | 51      | 41.2        | 19.8     |
| RLL-01/2    | 17.80                       | 10.64                        | 76.00                         | 119.30                    | 48      | 41.1        | 21.7     |
| RLL-01/3    | 16.80                       | 9.70                         | 66.30                         | 101.20                    | 48      | 43.9        | 19.7     |
| RLL-01/4    | 12.12                       | 7.83                         | 48.50                         | 93.50                     | 41      | 51.3        | 18.6     |
| RLL-01/5    | 13.90                       | 8.46                         | 54.20                         | 108.10                    | 32      | 55.7        | 15.3     |
| RLL-03/1    | 16.60                       | 9.72                         | 64.40                         | 126.90                    | 37      | 65.9        | 10.1     |
| RLL-03/2    | 14.40                       | 9.39                         | 62.60                         | 114.90                    | 35      | 64.3        | 11.7     |
| RLL-03/3    | 13.40                       | 8.21                         | 50.60                         | 103.10                    | 36      | 65.7        | 13.7     |
| RLL-03/4    | 14.00                       | 8.40                         | 53.20                         | 111.00                    | 34      | 64.9        | 10.9     |
| RLL-03/5    | 12.74                       | 7.90                         | 50.20                         | 120.20                    | 28      | 69.2        | 7.5      |
| RLL-04/1    | 9.21                        | 6.17                         | 33.10                         | 70.60                     | 39      | 60.5        | 13.7     |
| RLL-04/2    | 10.47                       | 7.08                         | 43.00                         | 87.10                     | 37      | 60.4        | 13.1     |
| RLL-04/3    | 10.05                       | 6.29                         | 34.30                         | 95.70                     | 34      | 66.5        | 13.4     |
| RLL-04/4    | 10.79                       | 6.10                         | 32.70                         | 85.40                     | 36      | 60.9        | 16.3     |
| RLL-04/5    | 8.97                        | 6.90                         | 39.70                         | 80.80                     | 31      | 61.7        | 16.5     |
| RLL-04/6    | 10.77                       | 6.76                         | 40.10                         | 103.50                    | 28      | 57.8        | 18.5     |
| RLL-05/1    | 12.72                       | 7.96                         | 49.40                         | 104.50                    | 31      | 45.6        | 19.4     |
| RLL-05/2    | 12.04                       | 7.48                         | 45.70                         | 93.40                     | 35      | 57.7        | 14.2     |
| RLL-05/3    | 12.42                       | 7.49                         | 46.10                         | 105.20                    | 32      | 71.9        | 9.4      |
| RLL-05/4    | 9.85                        | 6.09                         | 34.80                         | 92.30                     | 29      | 69.9        | 15.0     |
| RLL-05/5    | 11.39                       | 7.44                         | 46.20                         | 103.90                    | 30      | 43.1        | 30.0     |
| RLL-05/6    | 9.86                        | 6.15                         | 34.00                         | 101.70                    | 29      | 25.6        | 52.1     |
| RLL-06/1    | 10.74                       | 6.96                         | 40.30                         | 87.90                     | 35      | 35.4        | 27.8     |
| RLL-06/2    | 8.75                        | 5.91                         | 29.50                         | 71.00                     | 37      | 54.6        | 17.5     |
| RLL-06/3    | 7.55                        | 5.27                         | 23.70                         | 66.10                     | 30      | 41.1        | 30.5     |
| RLL-07/2    | 2.75                        | 2.52                         | 0.40                          | 8.29                      | 31      | 63.7        | 14.9     |
| RLL-07/3    | 3.07                        | 2.64                         | 1.50                          | 14.50                     | 27      | 65.1        | 16.6     |
| RLL-07/4    | 3.86                        | 3.12                         | 6.40                          | 22.70                     | 30      | 38.9        | 45.9     |
| RLL-07/5    | 3.70                        | 2.99                         | 5.40                          | 24.40                     | 28      | 21.3        | 69.3     |
| RLL-08/1    | 2.30                        | 2.24                         | 2.00                          | 2.94                      | 35      | 32.9        | 31.9     |
| RLL-08/2    | 2.48                        | 2.35                         | 2.30                          | 3.99                      | 40      | 28.1        | 28.6     |
| RLL-08/3    | 3.06                        | 2.65                         | 4.90                          | 9.14                      | 42      | 13.6        | 36.5     |
| RLL-09/1    | 2.62                        | 2.39                         | 3.10                          | 5.98                      | 39      | 22.4        | 31.5     |
| RLL-09/2    | 3.53                        | 2.93                         | 7.00                          | 14.50                     | 40      | 20.1        | 40.1     |
| RLL-09/3    | 3.58                        | 2.95                         | 6.70                          | 17.40                     | 39      |             |          |
| RLL-10/1    | 2.99                        | 2.65                         | 3.40                          | 10.50                     | 35      | 63.9        | 17.3     |
| RLL-10/2    | 3.42                        | 2.84                         | 4.50                          | 18.60                     | 29      | 72.7        | 13.0     |
| RLL-10/3    | 3.70                        | 2.99                         | 5.90                          | 20.10                     | 30      | 44.4        | 35.0     |
| RLL-10/4    | 3.98                        | 3.15                         | 7.20                          | 24.40                     | 31      | 28.5        | 57.5     |
| RLL-10/5    | 4.03                        | 3.15                         | 8.20                          | 27.20                     | 28      | 32.7        | 56.9     |
| RLL-11/1    | 2.34                        | 2.29                         | 1.20                          | 3.33                      | 38      | 22.7        | 36.9     |
| RLL-11/2    | 2.66                        | 2.39                         | 3.60                          | 6.68                      | 40      | 7.3         | 48.5     |
| RLL-11/3    | 3.12                        | 2.63                         | 4.20                          | 10.05                     | 36      | 11.1        | 53.7     |
| RLL-11/4    | 2.82                        | 2.49                         | 2.50                          | 8.37                      | 33      | 47.6        | 36.2     |

| <b>Soil sample</b> | <b>EC1:5<br/>dS m<sup>-1</sup></b> | <b>EC1:10<br/>dS m<sup>-1</sup></b> | <b>Cl1:10<br/>meq L<sup>-1</sup></b> | <b>ECe<br/>dS m<sup>-1</sup></b> | <b>SP<br/>%</b> | <b>Gypsum<br/>%</b> | <b>CCE<br/>%</b> |
|--------------------|------------------------------------|-------------------------------------|--------------------------------------|----------------------------------|-----------------|---------------------|------------------|
| RLL-12/1           | 2.29                               | 2.06                                | 2.10                                 | 3.03                             | 37              | 4.9                 | 46.5             |
| RLL-12/2           | 2.61                               | 2.40                                | 2.30                                 | 5.51                             | 39              | 33.4                | 38.6             |
| RLL-12/3           | 2.51                               | 2.33                                | 2.10                                 | 5.09                             | 36              | 81.0                | 8.8              |
| RLL-12/4           | 2.55                               | 2.34                                | 2.60                                 | 5.92                             | 32              | 72.0                | 16.3             |
| RLL-12/5           | 2.69                               | 2.42                                | 2.40                                 | 6.77                             | 33              | 54.1                | 26.2             |
| RLL-13/1           | 2.33                               | 2.20                                | 2.20                                 | 2.84                             | 42              | 4.5                 | 48.9             |
| RLL-13/2           | 2.30                               | 1.86                                | 1.90                                 | 3.05                             | 43              | 3.5                 | 51.9             |
